# Supplementary material for: Factors driving Arabian gazelles (Gazella arabica) in Israel to extinction: time series analysis of population size and juvenile survival in an unexploited population
Source: Springer Nature journal article supplement (doi:10.1007/s10531-019-01884-8), 2019-10-21

Factors driving Arabian gazelles (*Gazella arabica*) to extinction – time series analysis of population size and juvenile survival in an unexploited population

**Online supplementary material**

Table S1

GLS-AR(3) and GLS-AR(6) model outputs showing the effect of five environmental variables on *G. arabica* population size (dependent variable). Significant results (*p* < 0.05) are shown in bold font type.

| Model | AIC | Explanatory variables | *B* | SE | t | *p* | VIF |
| --- | --- | --- | --- | --- | --- | --- | --- |
| GLS-AR(3) | 15.64 | Rainfall | -0.06 | 0.03 | -1.59 | 0.13 | 1.67 |
|  | Wolf encounter rate | -0.25 | 0.16 | -1.62 | 0.12 | 1.37 |
|  | Greenness index | -0.70 | 0.54 | -1.28 | 0.22 | 1.59 |
|  | Annual max. temperature | 2.97 | 2.49 | 1.19 | 0.25 | 1.86 |
|  | ***G. dorcas* population** | 0.40 | 0.14 | 2.80 | **0.01** | 1.13 |
| GLS-AR(6) | 14.60 | Rainfall  **Wolf encounter rate**  Greenness index  Annual max. temperature  ***G. dorcas* population** | -0.03  -0.33  -0.15  -0.28  0.48 | 0.02  0.09  0.43  1.79  0.07 | -1.89  -3.51  -0.40  -0.15  6.86 | 0.08  **0.00**  0.72  0.88  **0.00** | 1.80  1.53  4.66  7.77  2.16 |

Figure S1

GLS-AR(0) model for the effect of five environmental variables on the *G. arabia* population size (dependent variable): (a) Variation of GLS-AR(0) model residuals over time, (b) autocorrelograms by means of ACF and (c) autocorrelograms by means of PACF indicating autocorrelations among measurements over time. Dotted line in (a) and (b) indicating the 95 % confidence interval of correlation coefficients.


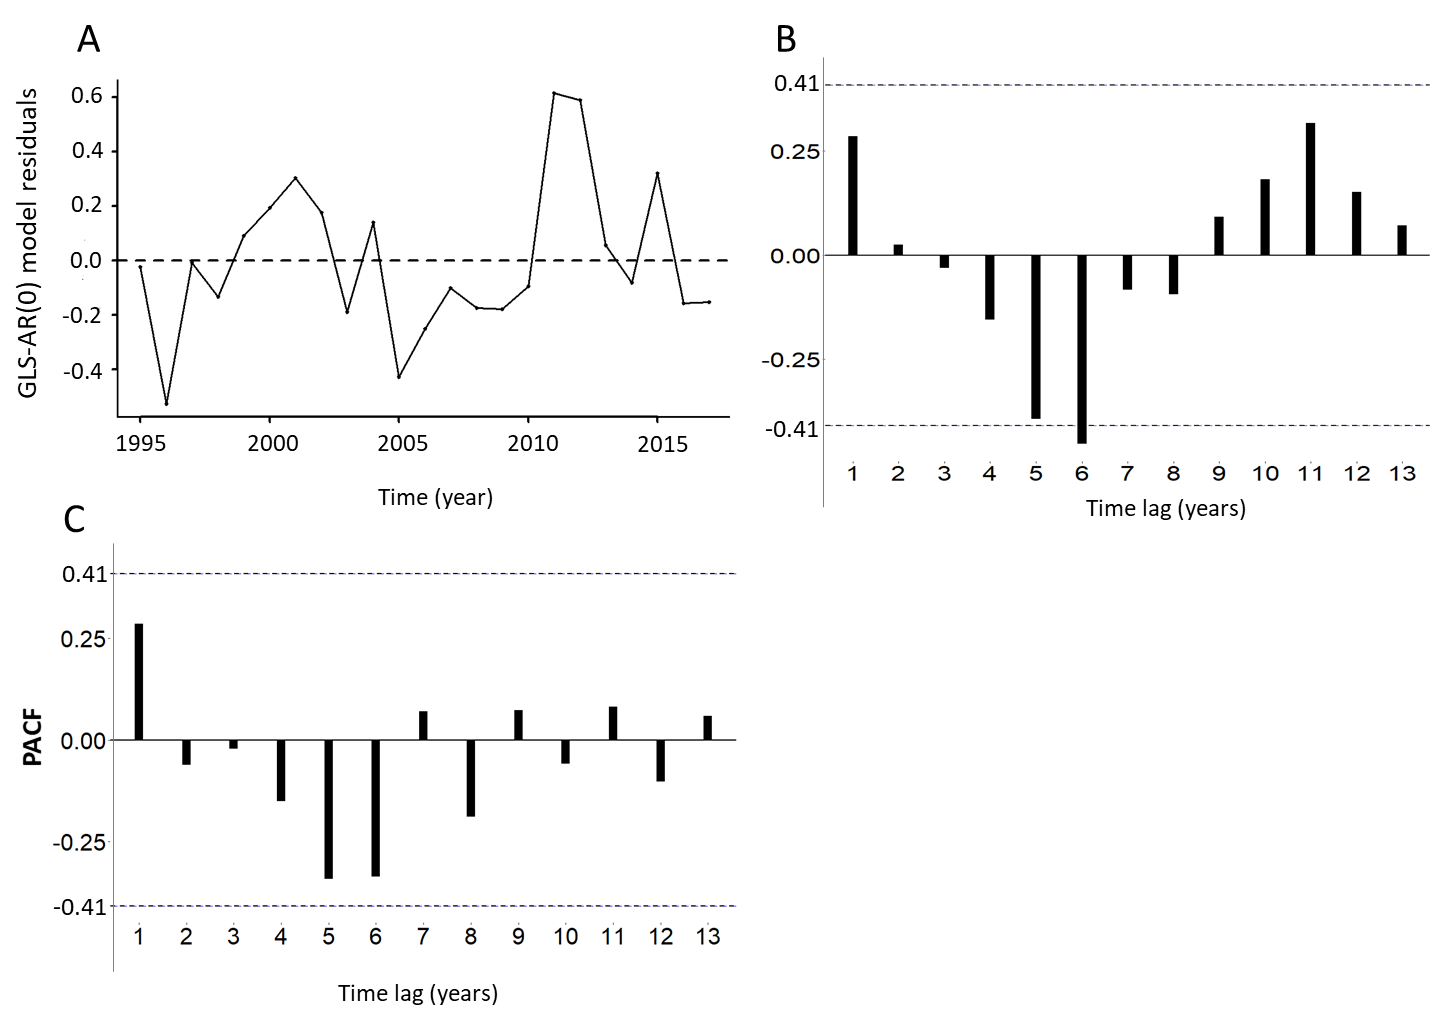


Figure S2

GLS-AR(0) model for the effect of five environmental variables on percentage fawn survival (dependent variable): (a) Variation of GLS-AR(0) model residuals over time, (b) autocorrelograms by means of ACF and (c) autocorrelograms by means of PACF indicating autocorrelations among measurements over time. Dotted line in (a) and (b) indicating the 95 % confidence interval of correlation coefficients.


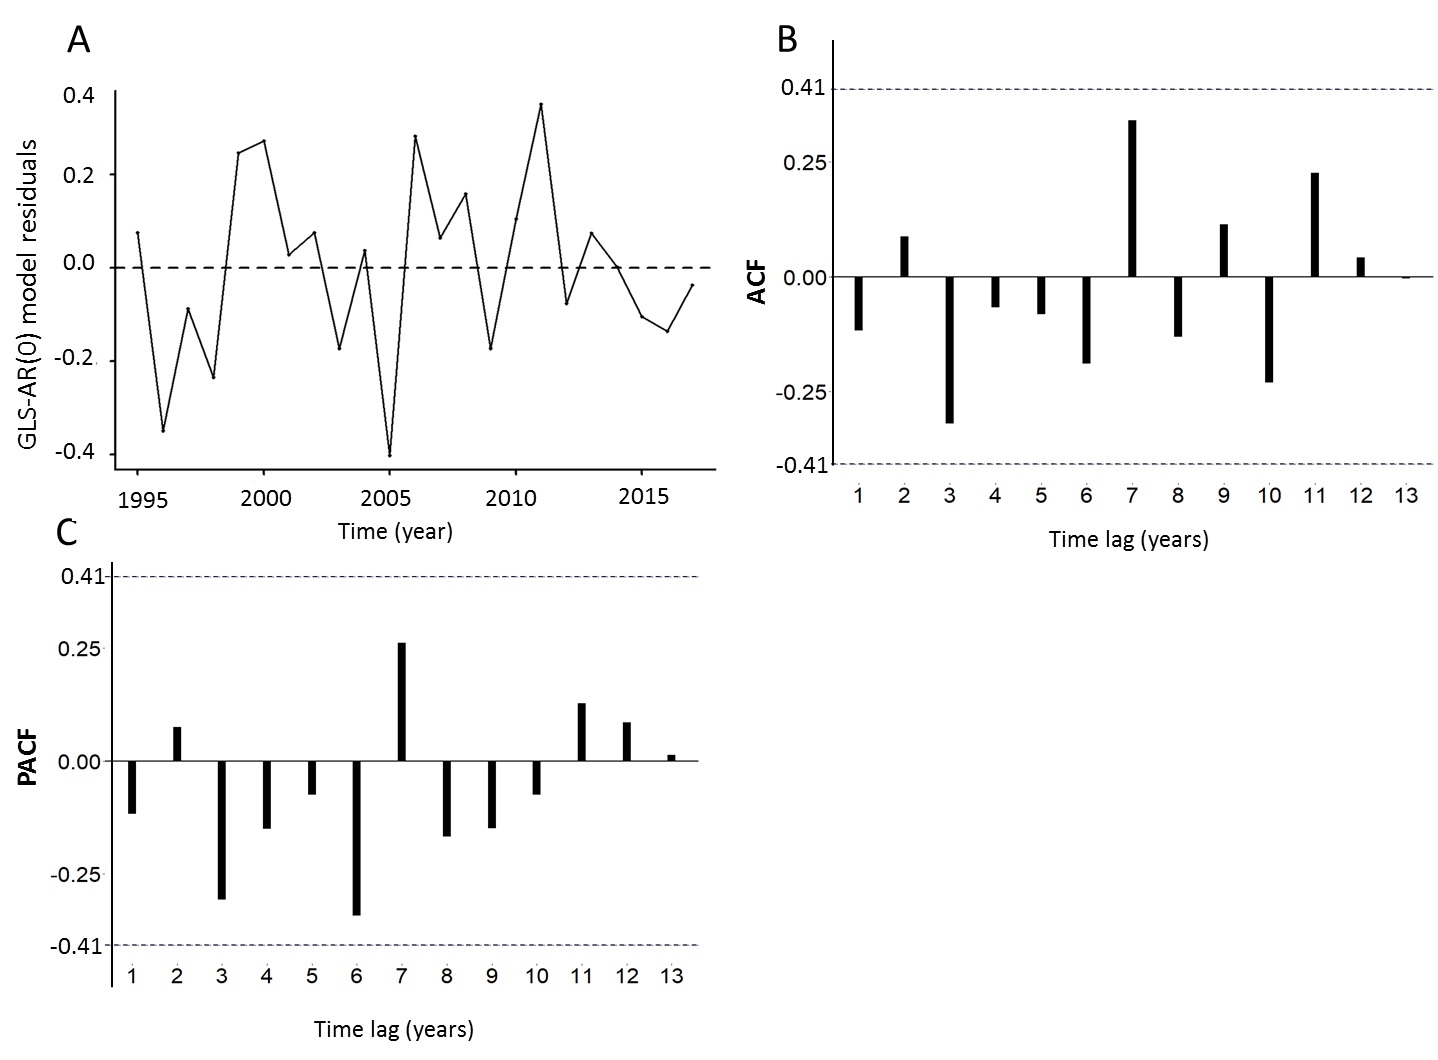

Supplement: MOESM1 [file 17321350]
